# Supplementary material for: Colloidal synthesis of VSe2single-layer nanosheets as novel electrocatalysts for the hydrogen evolution reaction
Source: Royal Society of Chemistry journal article supplement (doi:10.1039/c6cc03854a), 2016-01-01
Supplement: c6cc03854a1.pdf [file c6cc03854a1.pdf]

## Colloid Synthesis of Metallic VSe<sub>2</sub> Single-Layer Nanosheets as Novel Electrocatalysts for Hydrogen Evolution Reaction

Wenwen Zhao,<sup>a</sup> Bohua Dong,<sup>\*a</sup> Zenglong Guo,<sup>a</sup> Ge Su,<sup>a</sup> Rongjie Gao,<sup>a</sup> Wei Wang and Lixin Cao,<sup>\* a</sup>

Institute of Materials Science and Engineering, Ocean University of China, 238 Songling Road,  
Qingdao, 266100 P. R. China

\*To whom correspondence should be addressed. E-mail: dongbohua@ouc.edu.cn,  
caolixin@ouc.edu.cn

### Experimental Section

#### I. Materials and Methods

Vanadyl acetylacetonate 99%, Selenium 99.9% metals basis, 200 mesh and Oleylamine (OM) (C<sub>18</sub>, 80%–90%) were purchased from Aldrich. Hexamethylene≥99.0% were purchased from Sinopharm Chemical Reagent Co., Ltd. All electrolyte solutions were prepared with ultrapure water (GWA-UN1-F20 type Beijing Purkinje General Instrument Co., Ltd.). All other reagents were of analytical grade and used without further purification.

**Synthesis of VSe<sub>2</sub> monolayer.** 0.3mmol VO(C<sub>5</sub>H<sub>7</sub>O<sub>2</sub>)<sub>2</sub>, 0.6mmol Selenium powder and 10ml oleylamine was added to a 100mL three-necked under N<sub>2</sub> atmosphere. The reaction mixture was stirred moderately and was heated using a heating mantle, to remove water and other low-boiling impurities. The mixtures are evacuated for 30 minutes at 140 °C. Next the solution was purged with N<sub>2</sub> and heated to 330 °C. After holding the solution at 330 °C for 1.5h, the reaction was stopped and cooled down to room temperature by removing heating source. The contents of the reaction mixture were added with alcohol and transferred into centrifuge tubes, the VSe<sub>2</sub> nanosheets were precipitated by the centrifugation at 5000 rpm for 5 min. The

nanosheets were washed with 1:2 (v:v) cyclohexane:ethanol for several times. A part of the sample was dispersed in cyclohexane, the rest of products were dried in 60 °C in the vacuum drying oven. To demonstrate the large-scale synthesis, we performed the reaction with 40 mmol of V precursor and obtained as much as 1.36 g of VSe<sub>2</sub> monolayer in a single batch

**Characterization.** The atomistic structure information and microtopography were characterized by XRD on a Bruker D8 Advance X-ray diffractometer fitted with CuK $\alpha$  radiation over the 2 $\theta$  ranges from 2 $\theta$  = 10° to 70° on increments of 0.019° at the scanning speed of 4°/min, the TEM measurements on a JEOL JEM 1200 TEM microscope at an acceleration voltage of 100kV. HRTEM images were carried out on a FEI Tecnai G2 F20 field emission electron microscope with an EDS section at an acceleration voltage of 200 kV. High Angle Annular Dark Field Scanning Transmission Electron Microscope (HAADF-STEM) images and mapping section were obtained using Titan G2 60-300 TEM/STEM (FEI, America) at an acceleration voltage of 300kV. AFM on a DI Veeco Multimode SPM platform, XPS spectrum on a Kratos Amicus X-ray photo-electron spectrometer with an Al K $\alpha$  excitation source of 180W, Raman spectra on a LabRAM HR800 Horiba Jobin Yvon, respectively.

**Electrochemical measurements.** Electrochemical measurements were performed in a standard three-electrode electrochemical cell using an electrochemical workstation (CHI760E). Glassy carbon electrode, saturated calomel electrode(SCE), and platinum electrode were used as working, reference, and counter electrodes, respectively. The VSe<sub>2</sub> nanocrystals were washed by 1:2 (v:v) cyclohexane:ethanol for three times and precipitated by the centrifugation at 10000 rpm for 1 min. The precipitates were dispersed in ethanol. Firstly, the freestanding VSe<sub>2</sub> film comprised of monolayer was produced by vacuum filtering and treated by oxygen plasma exposure for 3 min. Then the VSe<sub>2</sub> film with OPE treatment as electrocatalysts were loading on the glassy carbon electrode with 3 $\mu$ L Nafion (0.5 wt%), drying in 60°C in the vacuum drying oven. VSe<sub>2</sub> was loaded onto the glassy carbon surface at 0.3 mg cm<sup>-2</sup>. All cyclic voltammetry of the HER activity was conducted using 0.5M H<sub>2</sub>SO<sub>4</sub>

electrolyte under continuous purging with 99.99% N<sub>2</sub>. Linear sweep voltammetry was performed between 0 and -0.6V with a 5mV·s<sup>-1</sup> scan rate, the Pt/C was performed using same measurements. In 0.5M H<sub>2</sub>SO<sub>4</sub>, E (RHE) = E (SCE) + 0.244 V. Electrochemical impedance spectroscopy was performed when the working electrode was biased at a constant -0.167V vs. RHE while sweeping the frequency from 100kHz to 10 mHz with amplitude of 2mV. The electrochemical stability of the catalyst was evaluated by cycling the electrode 100 times, each cycle started at 0V and ended at -0.6V with a scan rate of 5mV·s<sup>-1</sup>.

### Supporting Figures

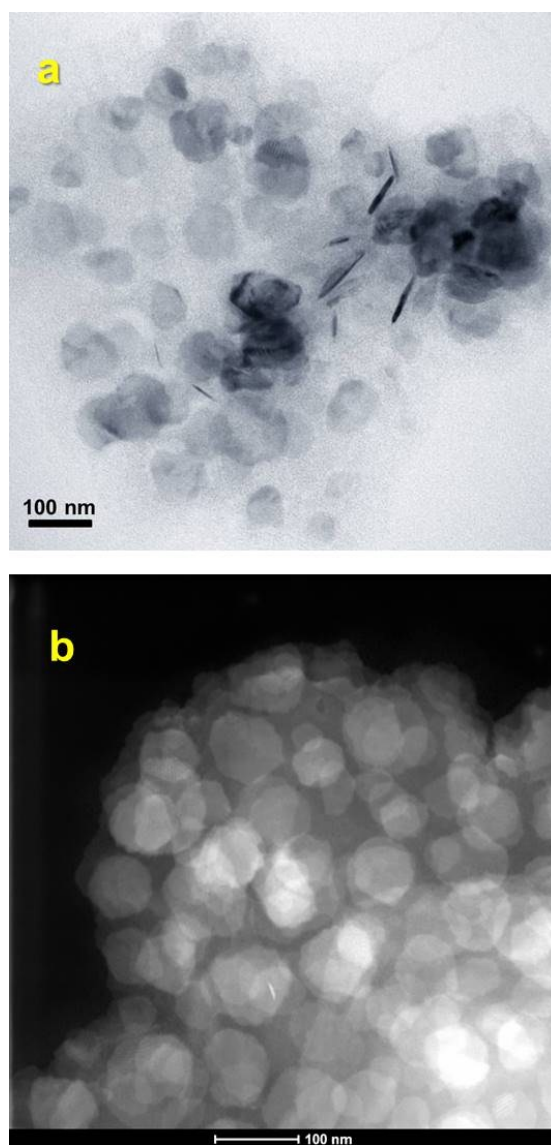

**Figure S1** (a) Typical TEM image and (b) enlarged HAADF-STEM image of VSe<sub>2</sub> monolayer.

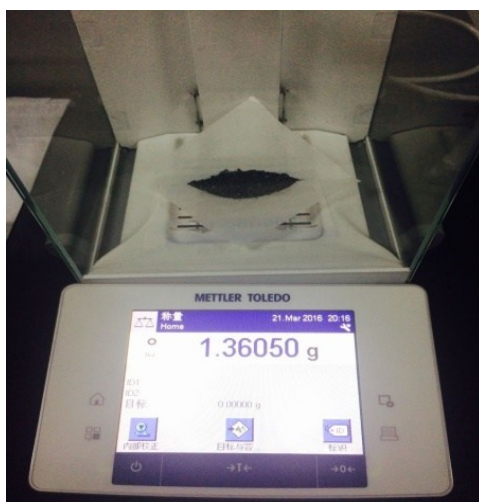

**Figure S2** Gram-scale production of VSe<sub>2</sub> single-layer nanosheets.

**Table S1.** The experiment conditions for synthesis of high-quality VSe<sub>2</sub> monolayer

| Sample | Reaction temperature (°C) | Reaction time | Solvent and capping ligand | Selenium source  | Product                                                   |
|--------|---------------------------|---------------|----------------------------|------------------|-----------------------------------------------------------|
| 1      | 235                       | 1.5h          | OM                         | Se               | VO <sub>x</sub> , VSe <sub>2</sub> , Se, SeO <sub>x</sub> |
| 2      | 260                       | 1.5h          | OM                         | Se               | VO <sub>x</sub> , VSe <sub>2</sub> , Se, SeO <sub>x</sub> |
| 3      | 280                       | 1.5h          | OM                         | Se               | VSe <sub>2</sub> , Se, SeO <sub>x</sub>                   |
| 4      | 300                       | 1.5h          | OM                         | Se               | VSe <sub>2</sub> , Se                                     |
| 5      | 235                       | 1.5h          | ODA                        | Se               | VSe <sub>2</sub> , Se                                     |
| 6      | 291                       | 1.5h          | TDA                        | Se               | VSe <sub>2</sub> , Se                                     |
| 7      | 330                       | 1.5h          | OLA                        | Se               | Impurity, Se                                              |
| 8      | 235                       | 1.5h          | ODA                        | SeO <sub>2</sub> | VSe <sub>2</sub> bulk, Se, SeO <sub>2</sub>               |
| 9      | 330                       | 1.5h          | OM                         | SeO <sub>2</sub> | VSe <sub>2</sub> , Se                                     |
| 10     | 330                       | 1min          | OM                         | Se               | VSe <sub>2</sub> , Se                                     |
| 11     | 330                       | 20min         | OM                         | Se               | VSe <sub>2</sub> , Se                                     |
| 12     | 330                       | 40min         | OM                         | Se               | VSe <sub>2</sub> , Se                                     |
| 13     | 330                       | 1h            | OM                         | Se               | VSe <sub>2</sub> monolayer                                |
| 14     | 330                       | 1.5h          | OM                         | Se               | VSe <sub>2</sub> monolayer                                |

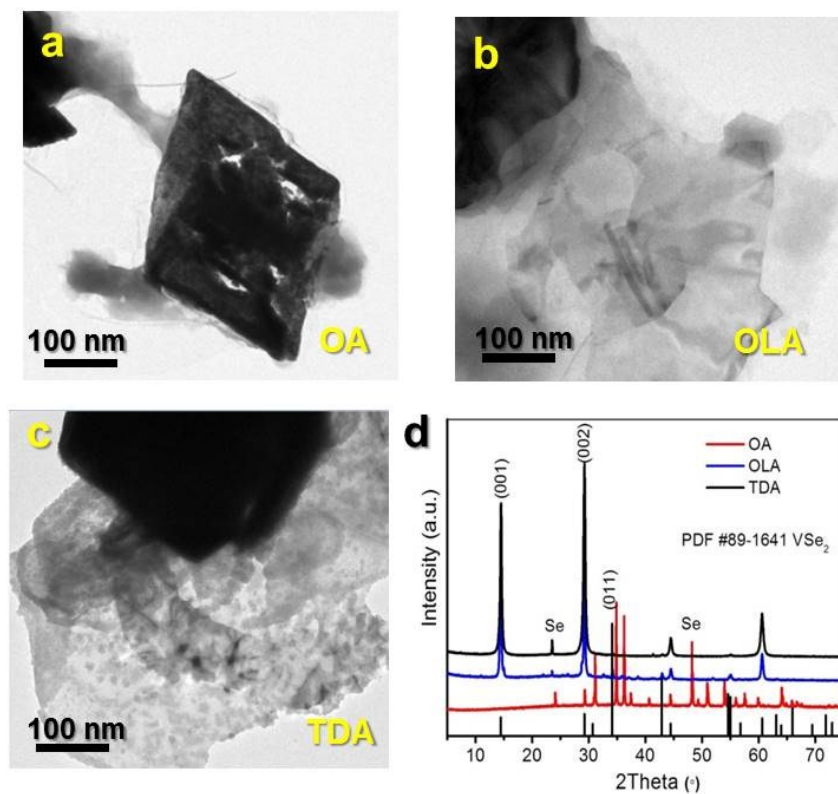

**Figure S3.** Capping ligand-dependent experiment. TEM images of VSe<sub>2</sub> nanosheets prepared with OA (a), OLA (b) and TDA (c) as capping ligand. (d) Corresponding XRD patterns.

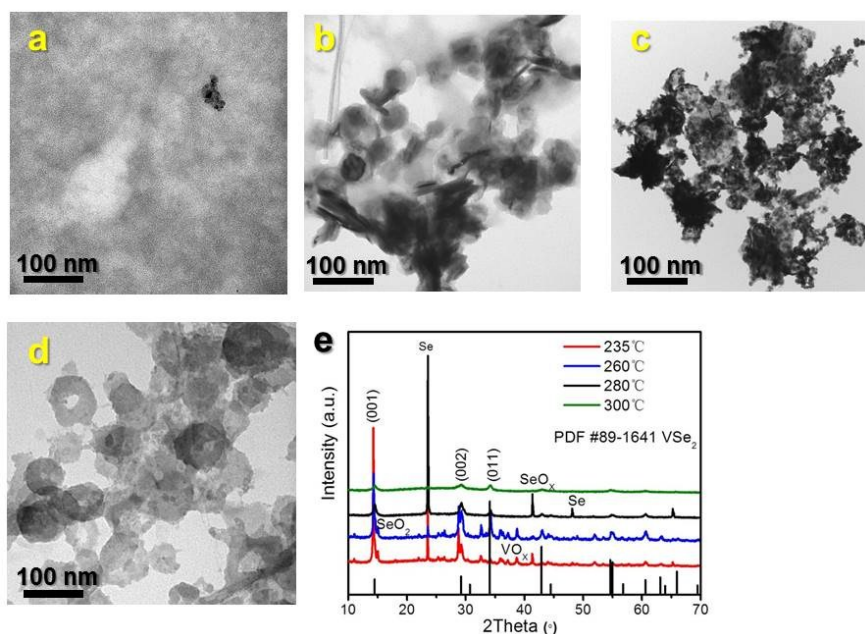

**Figure S4.** Reaction temperature-dependent experiment. TEM images of VSe<sub>2</sub> nanosheets prepared at different temperature 230 °C (a), 260 °C (b), 280 °C and 3000 °C. (e) Corresponding XRD patterns.

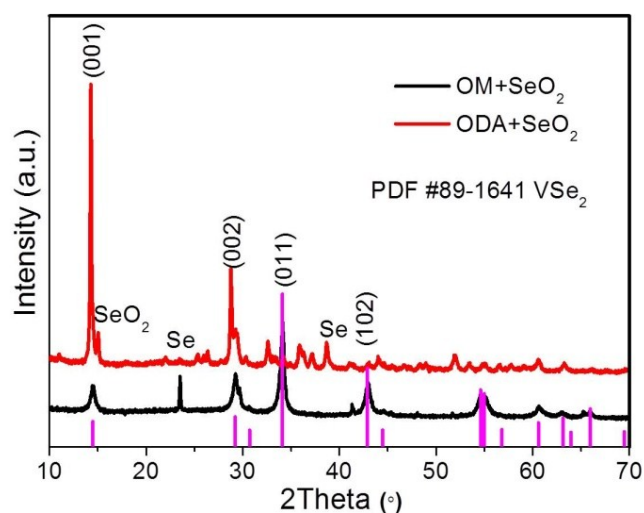

**Figure S5.** Se precursor -dependent experiment. XRD patterns of samples prepared with  $\text{SeO}_2$

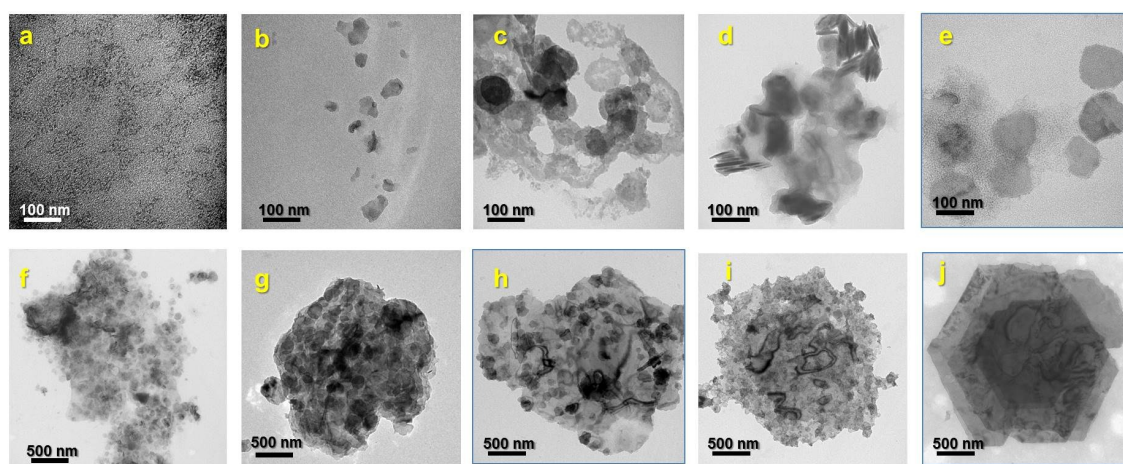

**Figure S6.** Reaction time-dependent experiment

The formation mechanism of the  $\text{VSe}_2$  nanosheet. TEM images of aliquots taken during the formation of the  $\text{VSe}_2$  nanosheet, highlighting initial nucleation (a-b), agglomeration (c-d), and coalescence of nanoparticle seeds into monolayer (e). Further growth involves lateral and vertical growth. Firstly, the monolayers show a clear tendency to self-assemble into large 2D sheets driven by the oriented attachment (f-g). Interestingly, once lateral growth has defined the large 2D nanosheet (h-i), we see evidence of vertical growth that generally maintains the lateral dimensions while increasing the thickness. Obviously, the initial large 2D nanosheet acts as a template for the growth of subsequent layers, which suggests that the nanosheets “grow out” laterally and then “grow up” vertically<sup>1,2</sup>.



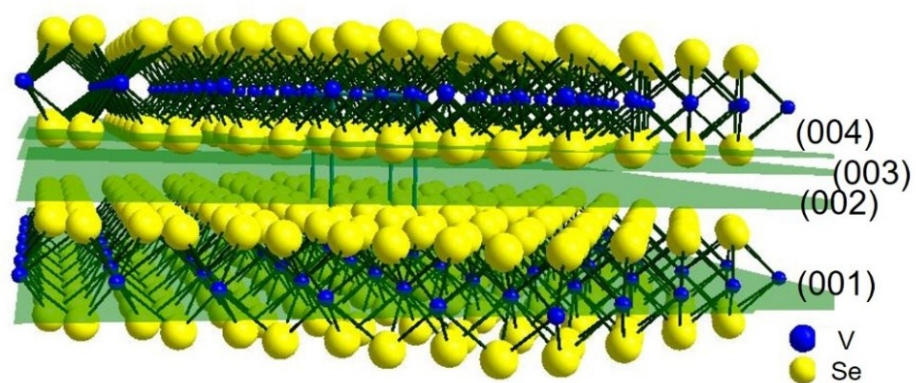

**Figure S7** Crystal structure model of VSe<sub>2</sub> multiple-layer.

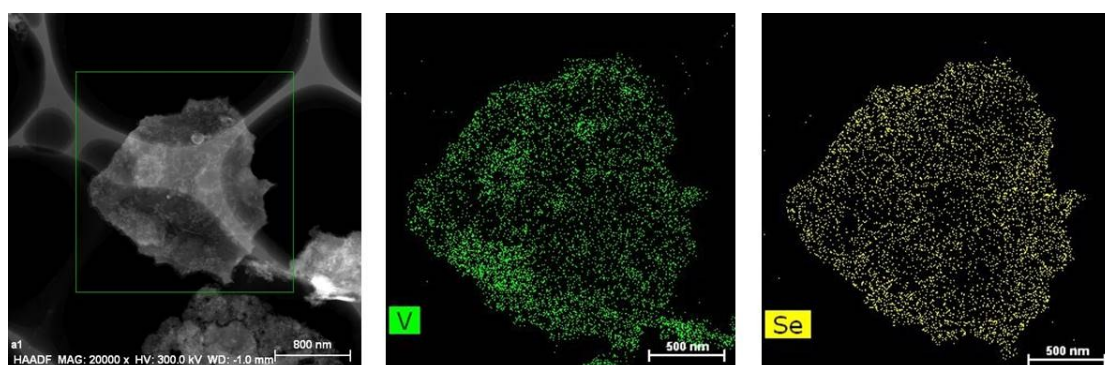

**Figure S8** HAADF-STEM and EDS mapping of VSe<sub>2</sub> multiple-layer

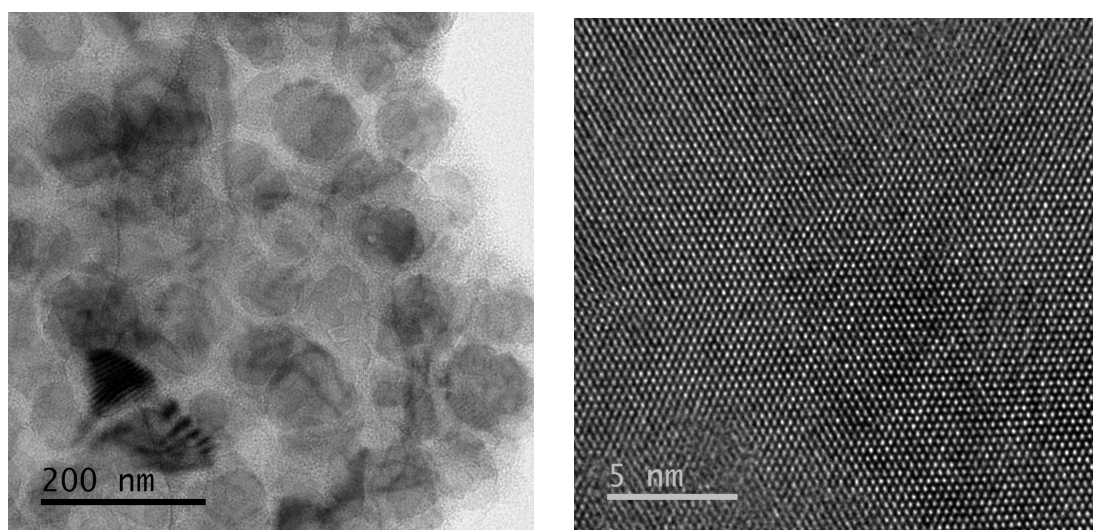

**Figure S9** TEM and HRTEM images of the VSe<sub>2</sub> monolayer after OPE

After OPE, there are no obvious defects and changes observed in the morphology and crystal structure of VSe<sub>2</sub> monolayer.

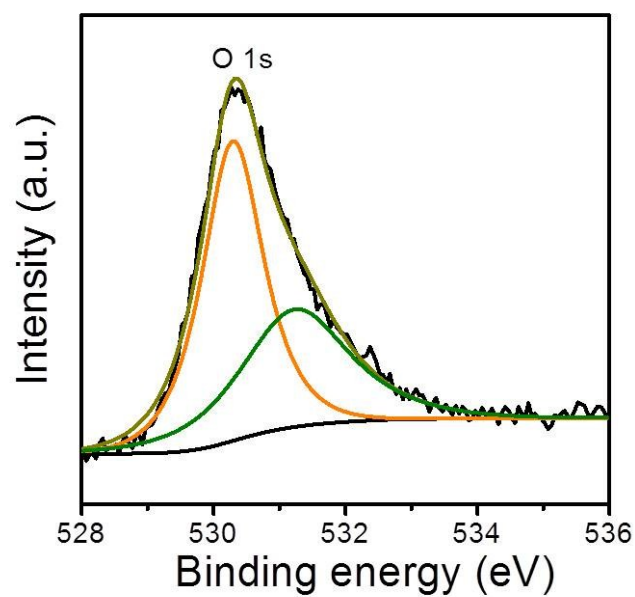

**Figure S10.** XPS spectra of VSe<sub>2</sub> single-layer nanosheets before and after OPE.

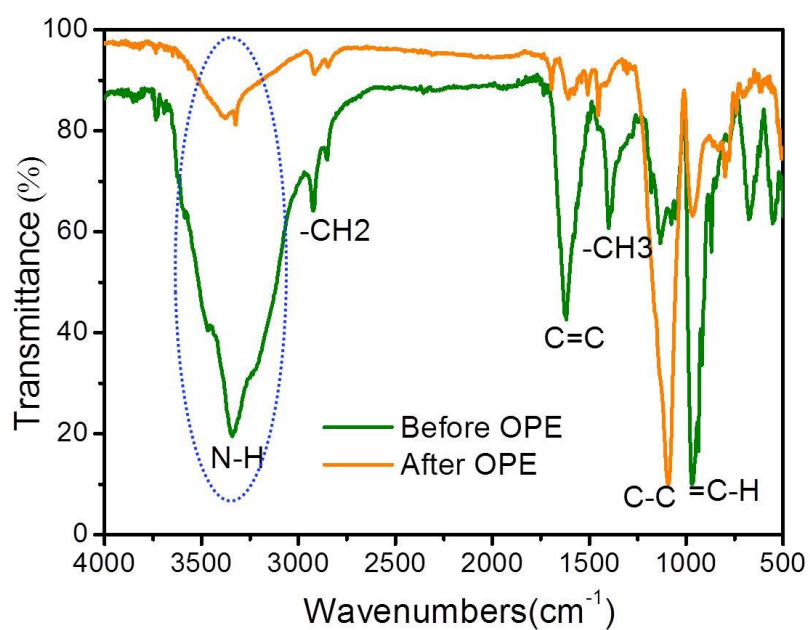

**Figure S11.** FTIR spectrum of VSe<sub>2</sub> single-layer nanosheets for O1s after OPE.



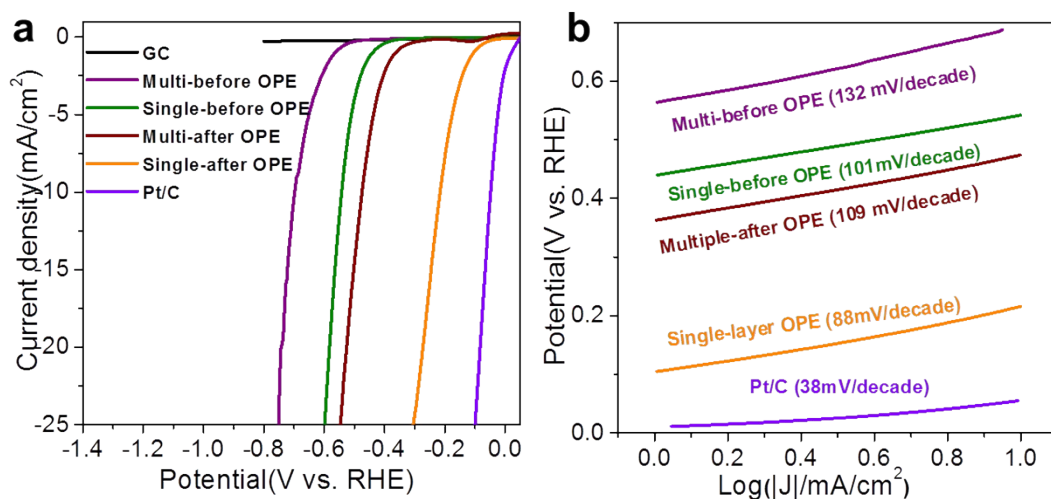

**Figure S12.** Electrocatalytic performance of VSe<sub>2</sub> single-layer and multiple-layer nanosheets before and after OPE. (a) Polarization curves. (b) Corresponding Tafel plots.

## REFERENCES

- (1) L. Li, Z. Chen, Y. Hu, X. Wang, T. Zhang, W. Chen, Q. Wang, *J Am Chem Soc* **2013**, *135*, 1213-1216.
- (2) D. D. Vaughn, 2nd, S. I. In, R. E. Schaak, *ACS Nano* **2011**, *5*, 8852-8860.
